# Supplementary material for: Distinct activation mechanisms of CXCR4 and ACKR3 revealed by single-molecule analysis of their conformational landscapes
Source: eLife. 2025 Apr 15;13:RP100098. doi: 10.7554/eLife.100098 (PMC11999697; doi:10.7554/eLife.100098)
Supplement: Figure 1—figure supplement 1—source data 1. [file elife-100098-fig1-figsupp1-data1.xlsx]

## Sheet: Sheet1
CXCR4							ACKR3
-5.699	100	3.7256	95.0761	10.4979			-5.699	100	6.1808	147.802	3.6758
-6.301	84.9702	5.6786	81.7273	8.4			-6.301	96.8979	1.7741	143.582	16.6457
-6.9031	72.7656	4.5596	65.4994	13.2741			-6.9031	92.3605	8.3431	131.398	3.207
-7.5051	53.1	6.4378	47.9991	9.1748			-7.5051	86.4213	1.7724	128.043	13.0268
-8.1072	33.9122	7.5369	34.3944	12.58			-8.1072	71.2049	8.2287	97.8772	5.3073
-8.7093	17.3123	4.5131	16.2077	10.0858			-8.7093	53.6762	1.3025	89.7954	13.9632
-9.3113	5.7948	9.9836	4.9046	18.7205			-9.3113	34.3257	7.5371	60.452	3.0205
-9.9134	3.005e-14	2.9911	0.1975	14.4937			-9.9134	-1.4359e-14	12.5519	18.373	5.1523
