# Supplementary material for: Distinct activation mechanisms of CXCR4 and ACKR3 revealed by single-molecule analysis of their conformational landscapes
Source: eLife. 2025 Apr 15;13:RP100098. doi: 10.7554/eLife.100098 (PMC11999697; doi:10.7554/eLife.100098)
Supplement: Figure 5—figure supplement 1—source data 1. [file elife-100098-fig5-figsupp1-data1.xlsx]

## Sheet: Sheet1
-5.699	100	5.5217	76.1856	13.1857
-6.301	92.0151	10.1426	74.8895	16.1523
-6.9031	89.7125	12.2571	74.0553	13.3456
-7.5051	81.107	14.5848	76.2281	17.2772
-8.1072	83.551	9.7179	71.0056	15.0037
-8.7093	46.9171	7.9644	33.1611	7.903
-9.3113	6.8923	7.2119	-8.9088	12.1118
-9.9134	0	6.3659	-24.5856	9.505
